# Supplementary material
Source: HighWire-hosted journal article supplement (https://thorax.bmj.com/content/73/5/422)
Supplement: inline-supplementary-material-3 [file inline-supplementary-material-3.pdf]

**Supplementary Table S4: Frequency of exacerbation events within Markov chain model**

| <b>Type of Exacerbation Transition</b> | <b>Average Days Between Events</b> | <b>Standard Deviation</b> |
|----------------------------------------|------------------------------------|---------------------------|
| Bacterial to Bacterial                 | 71.0                               | 55.50                     |
| Bacterial to non-Bacterial             | 49.1                               | 33.46                     |
| non-Bacterial to Bacterial             | 81.0                               | 67.63                     |
| non-Bacterial to non-Bacterial         | 59.2                               | 48.28                     |
| Viral to Viral                         | 68.7                               | 53.83                     |
| Viral to non-Viral                     | 74.9                               | 57.99                     |
| non-Viral to Viral                     | 60.3                               | 52.70                     |
| non-Viral to non-Viral                 | 68.0                               | 48.88                     |
| Eosinophilic to Eosinophilic           | 56.2                               | 59.00                     |
| Eosinophilic to non-Eosinophilic       | 52.4                               | 41.81                     |
| non-Eosinophilic to Eosinophilic       | 50.8                               | 35.37                     |
| non-Eosinophilic to non-Eosinophilic   | 72.7                               | 57.47                     |

| <b>ANOVA p-value</b> |
|----------------------|
| 0.07                 |
| 0.23                 |
| 0.51                 |
