# Supplementary material
Source: HighWire-hosted journal article supplement (https://thorax.bmj.com/content/73/5/422)
Supplement: inline-supplementary-material-5 [file inline-supplementary-material-5.pdf]

**Supplementary Table S1: Basic information about individuals**

| <b>SubID</b> | <b>Age</b> | <b>Sex</b> | <b>COPD Severity</b> | <b>Smoking Status</b> |
|--------------|------------|------------|----------------------|-----------------------|
| 1            | 63         | M          | Very severe          | Not current smoker    |
| 2            | 77         | M          | Severe               | Not current smoker    |
| 4            | 60         | F          | Very severe          | Current smoker        |
| 5            | 65         | M          | Severe               | Not current smoker    |
| 6            | 66         | F          | Moderate             | Current smoker        |
| 8            | 64         | M          | Moderate             | Not current smoker    |
| 9            | 69         | F          | Moderate             | Not current smoker    |
| 10           | 67         | F          | Moderate             | Not current smoker    |
| 11           | 68         | M          | Moderate             | Not current smoker    |
| 15           | 62         | F          | Moderate             | Current smoker        |
| 17           | 69         | M          | Severe               | Not current smoker    |
| 20           | 70         | M          | Severe               | Not current smoker    |
| 21           | 69         | M          | Severe               | Not current smoker    |
| 22           | 77         | M          | Severe               | Not current smoker    |
| 24           | 61         | M          | Very severe          | Not current smoker    |
| 25           | 71         | F          | Severe               | Current smoker        |
| 26           | 79         | F          | Moderate             | Not current smoker    |
| 27           | 62         | M          | Moderate             | Current smoker        |
| 29           | 68         | M          | Moderate             | Not current smoker    |
| 30           | 72         | M          | Moderate             | Not current smoker    |
| 32           | 59         | M          | Moderate             | Current smoker        |
| 33           | 64         | M          | Severe               | Current smoker        |
| 34           | 78         | M          | Moderate             | Not current smoker    |
| 35           | 76         | F          | Moderate             | Not current smoker    |
| 36           | 76         | M          | Very severe          | Current smoker        |
| 38           | 67         | F          | Severe               | Current smoker        |
| 39           | 79         | M          | Severe               | Not current smoker    |
| 41           | 51         | F          | Severe               | Current smoker        |
| 42           | 68         | M          | Severe               | Not current smoker    |
| 44           | 67         | M          | Severe               | Not current smoker    |
| 45           | 75         | M          | Moderate             | Not current smoker    |
| 46           | 62         | F          | Very severe          | Current smoker        |
| 48           | 70         | M          | Moderate             | Not current smoker    |
| 50           | 77         | M          | Moderate             | Not current smoker    |
| 51           | 71         | M          | Moderate             | Not current smoker    |
| 52           | 69         | F          | Severe               | Not current smoker    |
| 53           | 85         | M          | Severe               | Not current smoker    |
| 54           | 74         | F          | Severe               | Not current smoker    |
| 55           | 57         | M          | Moderate             | Not current smoker    |
| 56           | 66         | F          | Moderate             | Not current smoker    |
| 57           | 73         | M          | Moderate             | Not current smoker    |
| 58           | 66         | M          | Severe               | Not current smoker    |
| 59           | 62         | M          | Very severe          | Current smoker        |
| 60           | 71         | F          | Very severe          | Current smoker        |

|     |      |             |                    |
|-----|------|-------------|--------------------|
| 61  | 67 M | Moderate    | Current smoker     |
| 63  | 63 M | Moderate    | Not current smoker |
| 64  | 62 M | Very severe | Current smoker     |
| 66  | 67 M | Severe      | Not current smoker |
| 68  | 54 F | Moderate    | Current smoker     |
| 70  | 65 M | Very severe | Not current smoker |
| 71  | 82 M | Severe      | Not current smoker |
| 73  | 63 F | Severe      | Not current smoker |
| 74  | 69 F | Severe      | Not current smoker |
| 75  | 79 F | Moderate    | Not current smoker |
| 76  | 70 F | Severe      | Not current smoker |
| 78  | 64 M | Severe      | Current smoker     |
| 80  | 66 M | Moderate    | Current smoker     |
| 81  | 65 M | Severe      | Not current smoker |
| 82  | 61 F | Severe      | Current smoker     |
| 83  | 64 F | Very severe | Current smoker     |
| 84  | 54 M | Moderate    | Not current smoker |
| 85  | 74 F | Moderate    | Current smoker     |
| 86  | 77 M | Moderate    | Not current smoker |
| 92  | 54 F | Very severe | Current smoker     |
| 93  | 75 F | Severe      | Not current smoker |
| 94  | 78 M | Severe      | Not current smoker |
| 95  | 42 M | Moderate    | Current smoker     |
| 97  | 73 M | Moderate    | Current smoker     |
| 101 | 75 M | Moderate    | Not current smoker |
| 102 | 54 F | Moderate    | Not current smoker |
| 103 | 56 M | Moderate    | Current smoker     |
| 104 | 63 F | Severe      | Current smoker     |
| 109 | 63 F | Moderate    | Current smoker     |
| 111 | 78 M | Moderate    | Not current smoker |
| 112 | 68 M | Moderate    | Current smoker     |
| 113 | 68 F | Moderate    | Current smoker     |
| 115 | 65 F | Severe      | Current smoker     |
| 118 | 67 F | Severe      | Current smoker     |
| 120 | 59 F | Severe      | Not current smoker |
| 121 | 82 M | Severe      | Not current smoker |
| 122 | 82 F | Severe      | Current smoker     |
| 124 | 80 M | Severe      | Not current smoker |
| 125 | 67 M | Moderate    | Not current smoker |
| 126 | 59 F | Moderate    | Current smoker     |
| 127 | 70 M | Moderate    | Not current smoker |
| 128 | 71 M | Severe      | Not current smoker |
| 131 | 79 F | Very severe | Not current smoker |
| 132 | 63 F | Very severe | Not current smoker |
| 135 | 47 F | Moderate    | Current smoker     |
| 136 | 62 M | Severe      | Not current smoker |
| 137 | 82 F | Moderate    | Not current smoker |

|     |      |             |                    |
|-----|------|-------------|--------------------|
| 138 | 60 F | Severe      | Current smoker     |
| 141 | 66 M | Moderate    | Not current smoker |
| 142 | 56 F | Severe      | Current smoker     |
| 144 | 59 M | Severe      | Current smoker     |
| 145 | 62 F | Severe      | Current smoker     |
| 146 | 73 M | Moderate    | Not current smoker |
| 147 | 50 F | Moderate    | Current smoker     |
| 149 | 68 M | Very severe | Not current smoker |
| 150 | 68 M | Very severe | Not current smoker |
| 151 | 50 M | Very severe | Current smoker     |

| <b>Number of exacerbations</b> | <b>Bronchiectasis</b> | <b>ICS Usage</b> |
|--------------------------------|-----------------------|------------------|
| One exacerbation               | N                     | Y                |
| More than two exacerbations    | Y                     | Y                |
| More than two exacerbations    | Y                     | Y                |
| More than two exacerbations    | N                     | Y                |
| One exacerbation               | N                     | Y                |
| One exacerbation               | N                     | Y                |
| One exacerbation               | N                     | Y                |
| More than two exacerbations    | N                     | Y                |
| More than two exacerbations    | N                     | Y                |
| One exacerbation               | N                     | N                |
| More than two exacerbations    | N                     | Y                |
| Two exacerbations              | N                     | Y                |
| More than two exacerbations    | N                     | Y                |
| One exacerbation               | N                     | Y                |
| More than two exacerbations    | N                     | Y                |
| Two exacerbations              | N                     | Y                |
| Two exacerbations              | N                     | Y                |
| One exacerbation               | N                     | Y                |
| More than two exacerbations    | N                     | Y                |
| Two exacerbations              | N                     | Y                |
| One exacerbation               | N                     | Y                |
| More than two exacerbations    | N                     | Y                |
| More than two exacerbations    | N                     | Y                |
| More than two exacerbations    | N                     | Y                |
| More than two exacerbations    | N                     | Y                |
| More than two exacerbations    | N                     | Y                |
| More than two exacerbations    | N                     | Y                |
| More than two exacerbations    | N                     | Y                |
| One exacerbation               | N                     | Y                |
| More than two exacerbations    | N                     | Y                |
| More than two exacerbations    | Y                     | Y                |
| One exacerbation               | N                     | Y                |
| More than two exacerbations    | N                     | Y                |
| One exacerbation               | N                     | Y                |
| Two exacerbations              | N                     | Y                |
| One exacerbation               | N                     | N                |
| More than two exacerbations    | N                     | Y                |
| Two exacerbations              | N                     | Y                |
| Two exacerbations              | N                     | Y                |
| One exacerbation               | N                     | N                |
| One exacerbation               | N                     | N                |
| Two exacerbations              | N                     | Y                |
| Two exacerbations              | N                     | Y                |
| More than two exacerbations    | N                     | Y                |
| More than two exacerbations    | N                     | Y                |

|                             |   |   |
|-----------------------------|---|---|
| More than two exacerbations | N | Y |
| One exacerbation            | N | Y |
| More than two exacerbations | N | Y |
| Two exacerbations           | N | Y |
| More than two exacerbations | N | Y |
| More than two exacerbations | N | Y |
| One exacerbation            | Y | Y |
| More than two exacerbations | N | Y |
| More than two exacerbations | N | Y |
| One exacerbation            | N | Y |
| More than two exacerbations | N | Y |
| More than two exacerbations | N | Y |
| More than two exacerbations | N | Y |
| Two exacerbations           | Y | Y |
| More than two exacerbations | N | Y |
| More than two exacerbations | N | Y |
| One exacerbation            | N | Y |
| One exacerbation            | N | Y |
| One exacerbation            | N | Y |
| Two exacerbations           | N | Y |
| More than two exacerbations | Y | Y |
| More than two exacerbations | N | Y |
| More than two exacerbations | N | Y |
| Two exacerbations           | N | Y |
| More than two exacerbations | N | Y |
| More than two exacerbations | N | Y |
| One exacerbation            | N | N |
| One exacerbation            | N | Y |
| One exacerbation            | N | Y |
| More than two exacerbations | N | Y |
| One exacerbation            | N | Y |
| Two exacerbations           | N | Y |
| More than two exacerbations | N | Y |
| More than two exacerbations | N | Y |
| Two exacerbations           | N | Y |
| One exacerbation            | N | Y |
| One exacerbation            | N | Y |
| One exacerbation            | N | Y |
| Two exacerbations           | N | Y |
| One exacerbation            | N | Y |
| One exacerbation            | N | Y |
| Two exacerbations           | N | Y |
| One exacerbation            | N | Y |
| Two exacerbations           | Y | N |
| More than two exacerbations | N | Y |
| Two exacerbations           | N | Y |
| Two exacerbations           | N | Y |
| One exacerbation            | N | Y |

|                             |   |   |
|-----------------------------|---|---|
| More than two exacerbations | N | Y |
| Two exacerbations           | Y | Y |
| More than two exacerbations | Y | Y |
| More than two exacerbations | N | Y |
| More than two exacerbations | N | Y |
| More than two exacerbations | N | Y |
| Two exacerbations           | N | N |
| Two exacerbations           | N | Y |
| One exacerbation            | N | Y |
| More than two exacerbations | Y | Y |
